# Supplementary material for: Algorithms for Handoff Minimization in Wireless Networks
Source: Springer Nature journal article supplement (doi:10.1007/s11390-019-1948-2), 2019-07-01
Supplement: 11390_2019_1948_MOESM1_ESM.pdf [file 11390_2019_1948_MOESM1_ESM.pdf]

# Algorithms for Handoff Minimization in Wireless Networks

Mansoor Davoodi

Esmail Delfaraz

Sajjad Ghobadi

Mahtab Masoori

Davoodi M, Delfaraz E, Ghobadi S et al. Algorithms for handoff minimization in wireless networks. JOURNAL OF

COMPUTER SCIENCE AND TECHNOLOGY 34(4): 887–900 July 2019. DOI  
10.1007/s11390-019-1948-2

# Handoff Minimization Problem

When a user moves in an area covered by a WN to get the services, he may get connected to multiple APs. The *handoff* operation occurs when the user has to change the connection to the AP that can provide his desired services.

$\Delta$  is the maximum number of APs that cover any single point

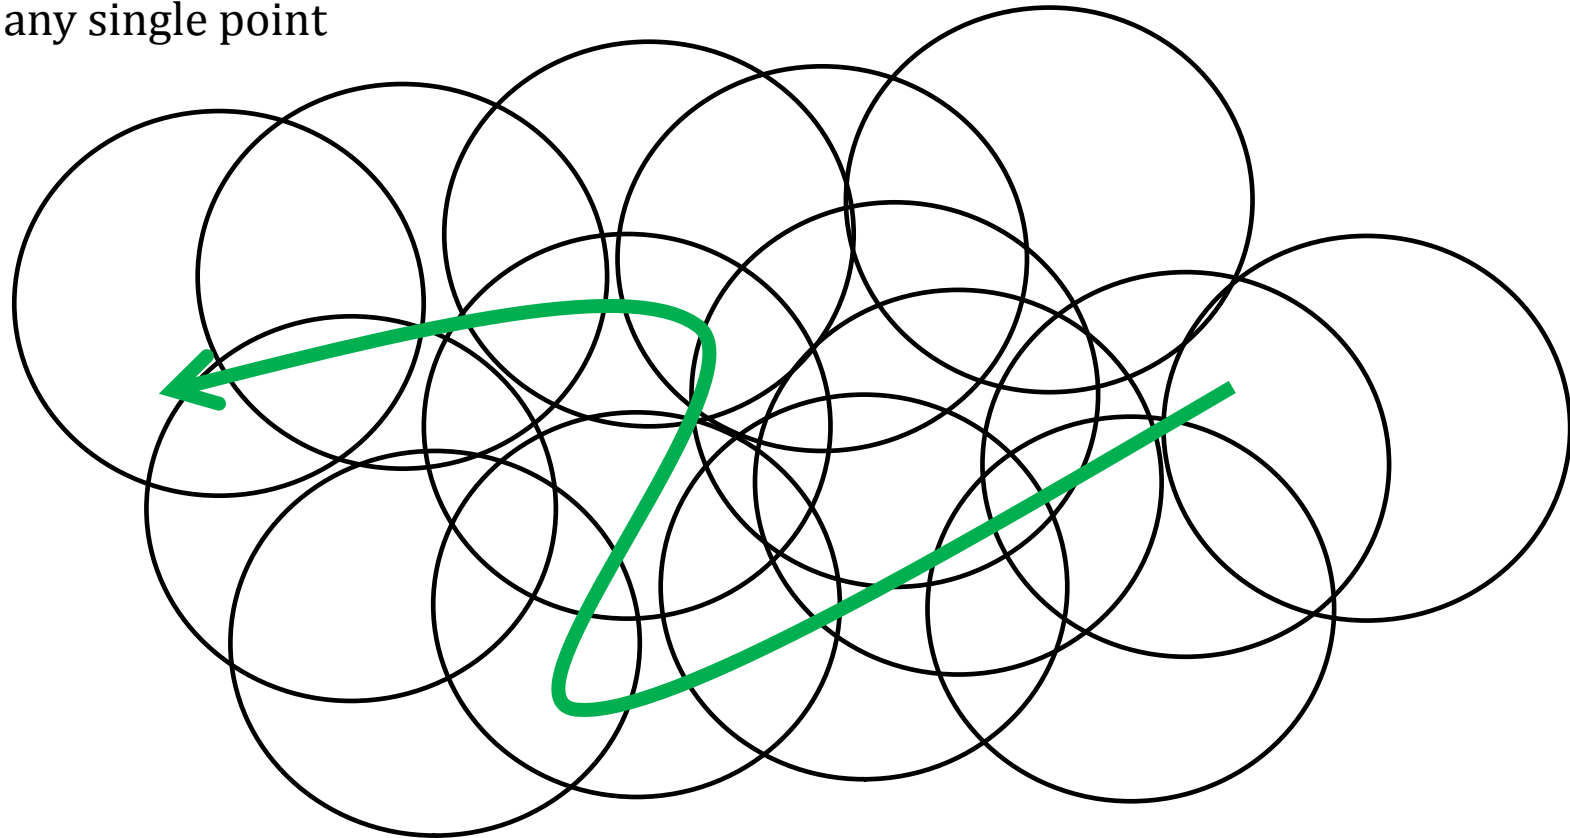

# Handoff Minimization Problem

PHM(*the number of users, setting, connectivity assumption, moving pattern*)

We Considered two offline and online settings of the problem, denoted by *off* and *on*.

When a user connects to an AP, he is keeping his connection to the AP until his received signal is not less than a certain threshold, denoted by *uca*, or without connectivity assumption, denoted by *wca*.

Group mobility, denoted by *gm*, and individual mobility, denoted by *im*, where all users move together and they have a group mobility or each user has an arbitrary mobility

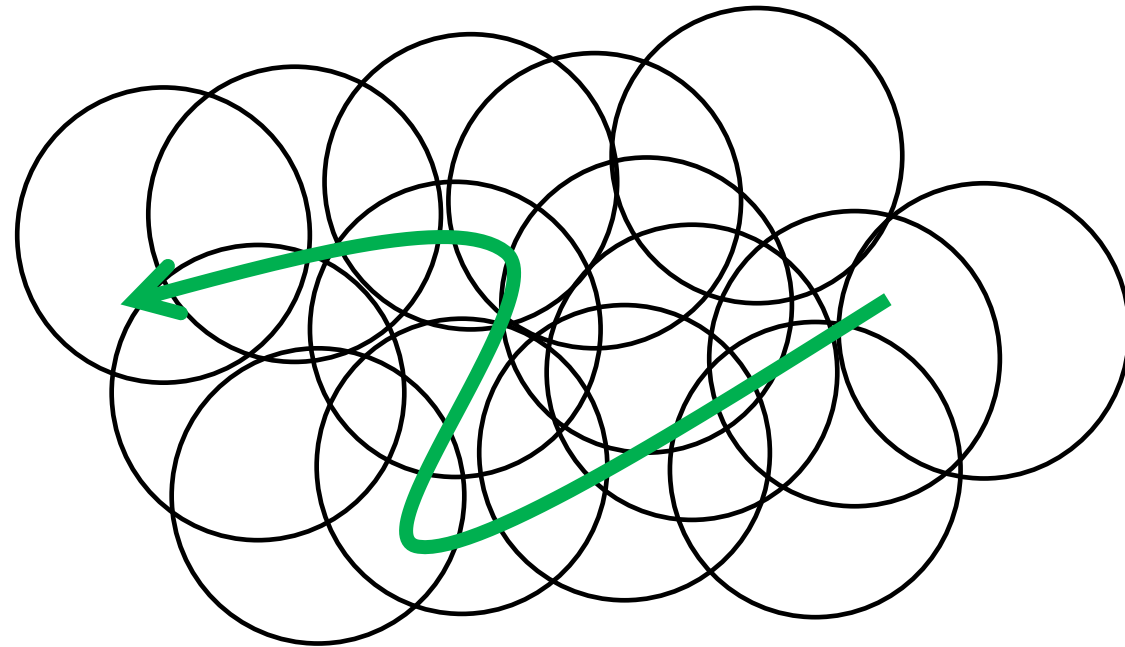

# Results

| Problems             | Results                                           | Competitive Ratio<br>(Deterministic) | Competitive Ratio<br>(Expected) |
|----------------------|---------------------------------------------------|--------------------------------------|---------------------------------|
| PHM(n, off, uca, gm) | Optimal Algorithm                                 | ---                                  | ---                             |
| PHM(n, on, uca, gm)  | Online Algorithm                                  | $\Delta(\text{Optimal})$             | $O(\log\Delta)$                 |
| PHM(2, off, uca, im) | No algorithm to prevent from unnecessary handoffs | ---                                  | ---                             |
| PHM(2, on, uca, im)  | No Competitive Algorithm                          | <i>Unbounded</i>                     | <i>Unbounded</i>                |
| PHM(2, off, wca, im) | Optimal Algorithm                                 | ---                                  | ---                             |
| PHM(n, on, wca, im)  | Online Algorithm                                  | $n\Delta(\text{Optimal})$            | $O(\log\Delta)$                 |
